# Supplementary material
Source: PubMed Central journal article supplement (PMC10041718)
Supplement: 13063_2023_7163_MOESM2_ESM.pdf [file 13063_2023_7163_MOESM2_ESM.pdf]

## PSV VENTILATION STRATEGY

**Assess at least once daily while on A/C for Criteria for Switching from A/C to PSV**

### INITIATION OF PSV

Ventilator Settings:

PS level: 10-20 cmH<sub>2</sub>O or at previous level  
 Inspiratory trigger: per clinician  
 Expiratory trigger: 25% of peak flow<sub>i</sub>  
 PEEP: at previous level  
 FiO<sub>2</sub>: at lowest level required to keep SpO<sub>2</sub> 90-96%

Alarm Settings:

Paw max: per clinician  
 RR max: 38 b/min  
 Vte max: 12 mL/kg of PBW  
 Vte min: 0 mL  
 VE max: 20 L/min  
 VE min: 5 L/min  
 Apnea setting: 20 s

**Assess at least every 8 hours while on PSV to determine if adjustments are needed to maintain Target Range**

### ALGORITHM TO ADJUST PSV BASED ON CLINICAL PARAMETERS

**No Respiratory Distress:**  
 Patient appears comfortable  
 RR 12-35 and Vte 5-10 mL/kg PBW

**Target range achieved.**  
 No adjustments required unless one of the following occurs:

RR <12 or >35 or Vte <5 or >10 mL/kg PBW:  
 Obtain arterial blood gas.  
 No adjustments required unless:

Respiratory alkalemia

Respiratory acidemia or **Respiratory Distress** (see definition)

Treat any apparent cause of hyperventilation (eg. Pain, anxiety, metabolic acidosis)

Decrease PS in steps of 2-3 cmH<sub>2</sub>O until Vte <8 mL/kg PBW and/or pH ≤7.47

**Respiratory Distress with ≥2 signs:**  
 See definition

Treat any apparent cause of respiratory distress (eg. secretions, bronchospasm, pulmonary edema)

Increase FiO<sub>2</sub> and/or PEEP as needed to keep SpO<sub>2</sub> >90%

Increase PS in steps of 2-3 cmH<sub>2</sub>O until respiratory distress resolves and pH ≥7.32 (confirm with repeat blood gas\*)

Switch to A/C mode if ≥ 1 of:  
 PS >20 cmH<sub>2</sub>O  
 PS + PEEP > 30 cmH<sub>2</sub>O  
 FiO<sub>2</sub> >60% required for SpO<sub>2</sub> ≥90%  
**Clinical instability** (see definition)†  
 Unable to trigger vent (NMB/sedation)

Reassess within 24 hours for Criteria for Switching from A/C to PSV

\*Repeat blood gas q 30 min as needed to confirm pH 7.32-7.47

†Best clinical judgement should always prevail in setting of deterioration, with frequent reassessment until stable

**Assess at least once daily while on PSV for Criteria to Initiate Weaning; Attempt to wean FiO<sub>2</sub> to 0.40 and PEEP to ≤8 cmH<sub>2</sub>O**

### ALGORITHM FOR WEANING

**Criteria to Initiate Weaning:**  
 SpO<sub>2</sub> ≥90%  
 FiO<sub>2</sub> ≤0.40  
 PEEP ≤8 cmH<sub>2</sub>O  
 pH ≥ 7.32  
 vasopressors no higher than norepinephrine 0.1 ug/kg/min

Pre-SBT readiness assessment:  
 CPAP 0 cmH<sub>2</sub>O and FiO<sub>2</sub> 0.40 for 2 min; assess f/Vt

f/Vt ≤100

f/Vt >100

SBT: t-piece, FiO<sub>2</sub> 0.40 for 30 min

Return to PSV  
 Reassess within 24 hr

Pass SBT:  
 assess for extubation

Fail SBT

↕

↕

## PAV+ VENTILATION STRATEGY

**Assess at least once daily while on A/C for Criteria for Switching from A/C to PAV**

### INITIATION OF PAV

Ventilator Settings:

IBW (Ideal Body Weight): Correct PBW (Predicted Body Weight)  
 Tube Type: ET or Trach  
 PAV %support/gain: 70%  
 Inspiratory trigger: per clinician  
 Expiratory trigger (Esens): 3 L/min  
 PEEP: at previous level  
 FiO<sub>2</sub>: at lowest level required to keep SpO<sub>2</sub> 90-96%

Alarm Settings:

Paw max: 40 cmH<sub>2</sub>O  
 RR max: 38 b/min  
 Vte max: 12 mL/kg of PBW  
 Vte min: 0 mL  
 VE max: 20 L/min  
 VE min: 5 L/min  
 Apnea setting: 20 s

**Assess at least every 8 hours while on PAV to determine if adjustments are needed to maintain Target Range**

### ALGORITHM TO ADJUST PAV BASED ON PHYSIOLOGIC AND CLINICAL PARAMETERS

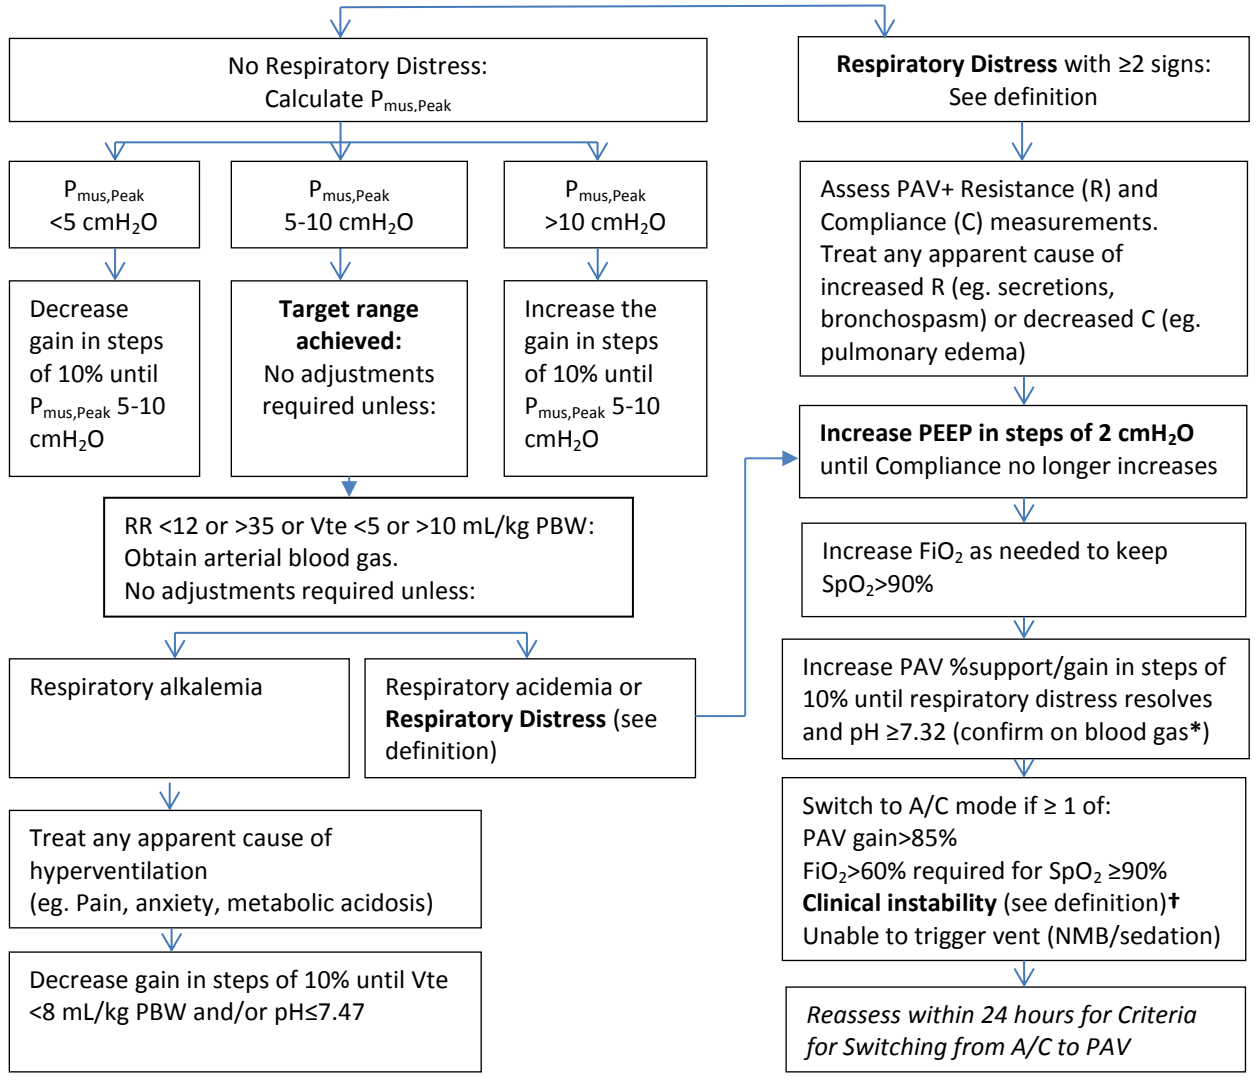

*\*Repeat blood gas q 30 min as needed to confirm pH 7.32-7.47*

*†Best clinical judgement should always prevail in setting of deterioration, with frequent reassessment until stable*

**Assess at least once daily while on PAV for Criteria to Initiate Weaning; Attempt to wean FiO<sub>2</sub> to 0.40 and PEEP to ≤ 8 cmH<sub>2</sub>O**

### ALGORITHM FOR WEANING

**Criteria to Initiate Weaning:**  
 SpO<sub>2</sub> ≥ 90%  
 FiO<sub>2</sub> ≤ 0.40  
 PEEP ≤ 8 cmH<sub>2</sub>O  
 pH ≥ 7.32  
 vasopressors no higher than norepinephrine 0.1 ug/kg/min

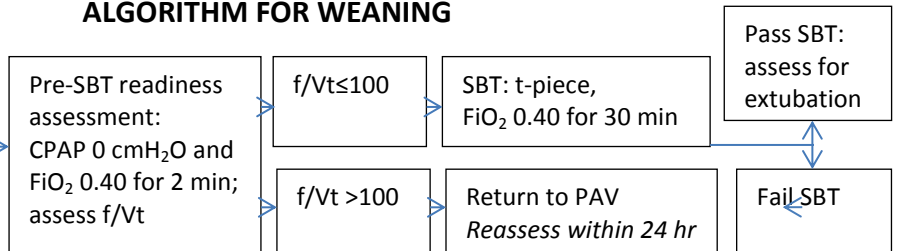

# Weaning /SBT Methods for PROMIZING

## Pre-SBT readiness assessment (CPAP Trial)

1. With patient's ETT connected to the ventilator circuit, change the ventilator mode to CPAP at 0 cmH<sub>2</sub>O and FiO<sub>2</sub> 0.40 (on PB 840 ventilator, choose **MODE: SPONT** and then choose **Spontaneous Type NONE**, then set PEEP to 0 and FiO<sub>2</sub> to 40%)
2. Monitor patient for 2 min
3. On the ventilator, assess the f/Vt ratio after 1-2 minutes at 0 cmH<sub>2</sub>O CPAP:
4. **FAIL:** If the f/Vt >100, or SpO<sub>2</sub> <90% or Clinical Instability, patient has failed the CPAP trial. Resume ventilation on settings used immediately prior to the CPAP test.
5. **PASS:** If the f/Vt is ≤100, and SpO<sub>2</sub> ≥90%, proceed to SBT

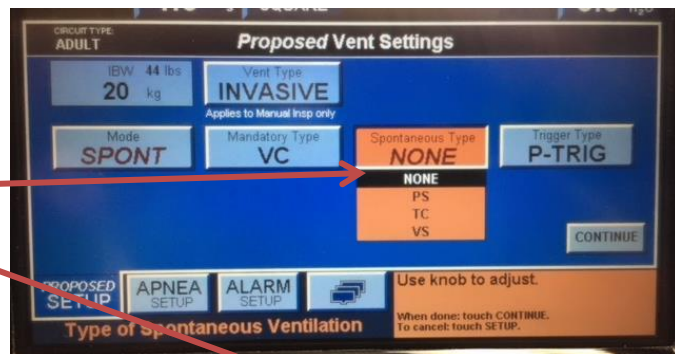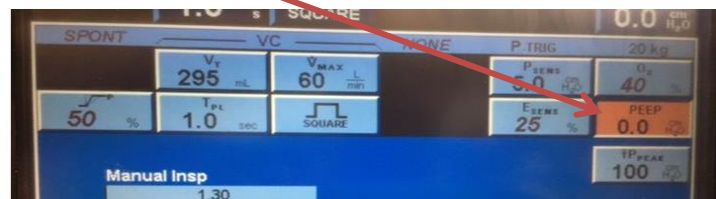

## SBT

1. Disconnect endotracheal tube from ventilator circuit and place patients on T-piece\* with FiO<sub>2</sub> 0.40. (For patients with tracheostomy, place patients on tracheostomy mask trial with FiO<sub>2</sub> 0.40)
2. Monitor patient for 30-120 minutes:
3. **FAIL/ SBT Termination:** Terminate the SBT and return patient to ventilator settings according to assigned algorithm if at any time one of the following occur:
  - a. Respiratory Distress
  - b. Clinical Instability
  - c. Increased somnolence with elevated pCO<sub>2</sub> and/or pH < 7.32
  - d. Desaturation with SpO<sub>2</sub> < 90% on FiO<sub>2</sub> 0.40
4. **PASS:** Patients will be considered to have passed the SBT if, after a minimum of 30 minutes and maximum of 120 minutes, none of the failure/SBT termination criteria have occurred.
5. **Extubation/Disconnection:** Proceed to evaluate patients with endotracheal tube for extubation criteria. Patients with tracheostomy who pass their initial SBT may remain off ventilator until they develop failure criteria. Tracheostomized patients who fail their initial SBT within 120 minutes may undergo gradual increments in tracheostomy mask trials according to local practice.

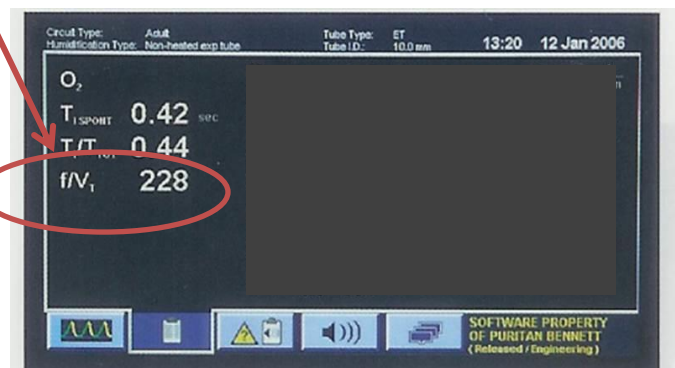

### T-Piece

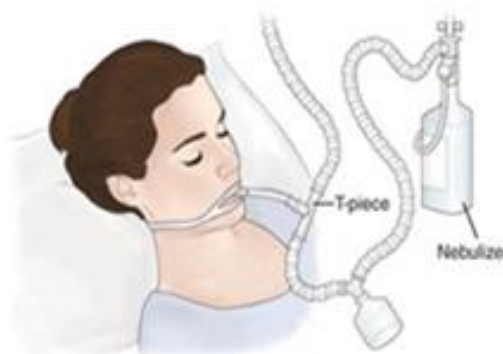

### Tracheostomy Mask Trial

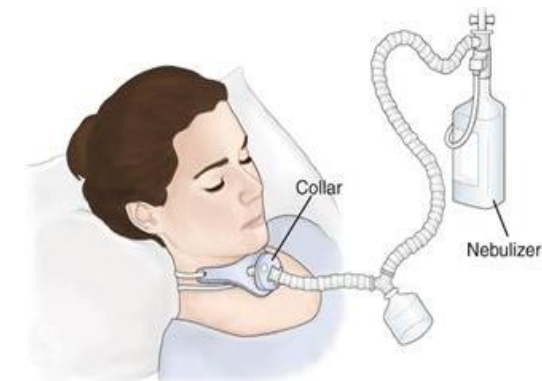

\*for the purposes of this study, the Sponsor considers SBT performed with patients connected to ventilator on flow-by with CPAP of 0 cmH<sub>2</sub>O and FiO<sub>2</sub> 0.40 to be equivalent to SBT performed on T-piece with FiO<sub>2</sub> 0.40.
